# Supplementary material
Source: publisher figshare collection journal article supplement (https://future-science-group.figshare.com/ndownloader/files/28655499)
Supplement: Supplementary file 1 [file 28655499]

**Supplementary Materials 2: Results of nuclear DNA analysis**

The influence of sample quantity and lysis parameters on the success of ancient DNA extraction from skeletal remains

**Supplementary Table 9: Consensus of the autosomal STR analysis of the GS97 nuclear DNA.**

**Supplementary Table 10: Consensus of the autosomal STR analysis of the DO902.01 nuclear DNA.**

| DO902.01 | Number of determined alleles | | | |
| --- | --- | --- | --- | --- |
|  | 10 mg | 50 mg | 150mg | 250mg |
| 2h | 3 | 12 | 13 | 13 |
| 4h | 9 | 12 | 13 | 12 |
| 10h | 5 | 11,5 | 13 | 13 |
| 18h | 6,5 | 14 | 13 | 13 |
| 48h | 2 | 12 | 13 | 13 |
| 18+2h | 10 | 12 | 13 | 13 |

**Supplementary table 11: Number of determined alleles for GS97 and DO902.01.**

| GS97 | Number of determined alleles | | | |
| --- | --- | --- | --- | --- |
|  | 10 mg | 50 mg | 150mg | 250mg |
| 2h | 9,5 | 12 | 9 | 12 |
| 4h | 8 | 12 | 12 | 12 |
| 10h | 8 | 12 | 12 | 12 |
| 18h | 4,5 | 12 | 12 | 12 |
| 48h | 9 | 12 | 12 | 12 |
| 18+2h | 10 | 11 | 12 | 8 |
